# Supplementary material
Source: MDPI journal article supplement (https://www.mdpi.com/2311-7524/9/5/593)
Supplement: s1 [file s1]

## Supplementary Materials

**Table S1.** Annual cumulated precipitation (mm) for each meteorological station for the period 1974-2021.

| Station name<br>year | Città di<br>Castello | Marsciano | Orvieto | Perugia | Spoletto | Terni  | Todi   | Umbertide |
|----------------------|----------------------|-----------|---------|---------|----------|--------|--------|-----------|
| 1974                 | 698.7                | 660.9     | 593     | 677.4   | 753.7    | 761.9  | 753.7  | 737.9     |
| 1975                 | 746.4                | 727.2     | 740.8   | 842.4   | 921      | 827.4  | 921    | 843       |
| 1976                 | 1079.5               | 912.2     | 919.6   | 1015.5  | 1193.4   | 1067.4 | 1193.4 | 1202      |
| 1977                 | 762.7                | 579       | 717     | 854.3   | 1071.1   | 923.4  | 1071.1 | 822       |
| 1978                 | 1065.4               | 654.9     | 777.2   | 940     | 1093.3   | 1070.2 | 1093.3 | 1098.7    |
| 1979                 | 796.8                | 677.4     | 883.3   | 859.6   | 1182.2   | 1123   | 1182.2 | 262.8     |
| 1980                 | 950.8                | 886.9     | 921     | 831.2   | 1148.2   | 935.6  | 1148.2 | 984.2     |
| 1981                 | 789.3                | 568       | 647.8   | 692.2   | 903      | 900    | 903    | 806.8     |
| 1982                 | 945.6                | 777.3     | 793.8   | 999.6   | 1066     | 818.4  | 1066   | 1033.7    |
| 1983                 | 664.4                | 617.9     | 615.6   | 627.8   | 1087.5   | 711.2  | 1087.5 | 718.7     |
| 1984                 | 1018                 | 1092.1    | 839.4   | 1064.6  | 1053     | 1043.2 | 1053   | 1094.7    |
| 1985                 | 640.6                | 576.7     | 461.4   | 531.4   | 714.2    | 831.8  | 714.2  | 588       |
| 1986                 | 875.3                | 813.4     | 909.5   | 797.9   | 1016.2   | 1073.4 | 1016.2 | 967.6     |
| 1987                 | 897.9                | 847       | 932.4   | 839     | 1127.8   | 886.8  | 1127.8 | 918.8     |
| 1988                 | 594.9                | 632.4     | 756.4   | 679     | 779.4    | 691.6  | 779.4  | 723       |
| 1989                 | 881.4                | 688       | 696.4   | 802.3   | 926.6    | 718.4  | 926.6  | 862.8     |
| 1990                 | 608.6                | 626.5     | 846.4   | 746.6   | 771      | 797.6  | 771    | 683.3     |
| 1991                 | 901.3                | 841.7     | 897.4   | 1050    | 931.8    | 1027.6 | 931.8  | 1002.5    |
| 1992                 | 859.5                | 747       | 760.6   | 968.4   | 990.4    | 692.8  | 990.4  | 864       |
| 1993                 | 720.4                | 670.8     | 671.4   | 806.7   | 957.6    | 791.4  | 957.6  | 791.1     |
| 1994                 | 689.1                | 673.3     | 573.9   | 722     | 682.7    | 683.2  | 682.7  | 642       |
| 1995                 | 884.1                | 705.9     | 525.6   | 803.5   | 892      | 702.9  | 892    | 787       |
| 1996                 | 902.6                | 913.7     | 941.6   | 1072.8  | 1229.2   | 1196.2 | 1229.2 | 1029.8    |
| 1997                 | 978.9                | 800.6     | 682.2   | 925.3   | 803.5    | 839.8  | 803.5  | 968.9     |

|      |        |        |        |        |        |        |        |        |
|------|--------|--------|--------|--------|--------|--------|--------|--------|
| 1998 | 754.9  | 783.2  | 650.8  | 1044.2 | 1036.5 | 910.6  | 1036.5 | 933.9  |
| 1999 | 953.4  | 791.2  | 992.6  | 1017.5 | 1073.8 | 946.6  | 1073.8 | 944.2  |
| 2000 | 956.3  | 746.2  | 833.8  | 864.8  | 837.4  | 782    | 837.4  | 951.2  |
| 2001 | 640.8  | 650.4  | 636.4  | 698.6  | 726    | 573    | 726    | 726.6  |
| 2002 | 973.2  | 898.8  | 952.3  | 973.9  | 931.5  | 810.7  | 931.5  | 934.9  |
| 2003 | 732.4  | 593.8  | 586.2  | 632.3  | 646    | 630    | 646    | 747.2  |
| 2004 | 1031.6 | 1065.6 | 1338.6 | 1155.7 | 1095   | 1177.4 | 1095   | 1105.4 |
| 2005 | 931.7  | 841.6  | 987.1  | 971.4  | 1169.8 | 1173.6 | 1169.8 | 1002.2 |
| 2006 | 702.4  | 580.8  | 618.2  | 705.4  | 639.8  | 650.8  | 639.8  | 817    |
| 2007 | 564.8  | 558.8  | 488    | 599.2  | 619.6  | 517    | 619.6  | 551.2  |
| 2008 | 864    | 852    | 1060.6 | 978.6  | 952.8  | 912    | 952.8  | 979.4  |
| 2009 | 769    | 715    | 924.6  | 730.2  | 818.6  | 850.8  | 818.6  | 769    |
| 2010 | 1129.7 | 1049.3 | 1211.8 | 1283.2 | 1268   | 1020.7 | 1268   | 1360.6 |
| 2011 | 559.3  | 489.9  | 612.8  | 560    | 572.4  | 611    | 572.4  | 599    |
| 2012 | 963.2  | 1016.7 | 993.4  | 982    | 875    | 830.4  | 875    | 861.2  |
| 2013 | 1081.1 | 907.3  | 946.8  | 1144.6 | 1167.2 | 1145.4 | 1167.2 | 1275.6 |
| 2014 | 1095.7 | 1086.7 | 1118.6 | 1085.2 | 1236   | 957.5  | 1236   | 1235.4 |
| 2015 | 704.5  | 633.2  | 739.1  | 547.6  | 880.6  | 700.6  | 880.6  | 686.6  |
| 2016 | 1050.8 | 875.3  | 904.6  | 995.6  | 1007.4 | 903.8  | 1007.4 | 942.8  |
| 2017 | 650    | 471.8  | 518.6  | 578    | 853.4  | 727.2  | 853.4  | 633.4  |
| 2018 | 791.2  | 834    | 1006.6 | 717    | 1036.7 | 900.2  | 1036.7 | 946.8  |
| 2019 | 1017.2 | 763.2  | 924.2  | 956    | 959    | 842.8  | 959    | 893.6  |
| 2020 | 809.2  | 745.4  | 856.4  | 942    | 1048.4 | 755.5  | 1048.4 | 966.8  |
| 2021 | 633.8  | 585.9  | 609.1  | 654.5  | 837.8  | 778.9  | 837.8  | 756.7  |

---

**Table S2.** Monthly precipitation (mm) for each meteorological station for the period 1974-2021

| Station Name             | Monthly cumulated precipitation (mm) |          |       |       |     |      |      |        |           |         |          |          |
|--------------------------|--------------------------------------|----------|-------|-------|-----|------|------|--------|-----------|---------|----------|----------|
|                          | January                              | February | March | April | May | June | July | August | September | October | November | December |
| <b>Città di Castello</b> | 61                                   | 66       | 68    | 75    | 71  | 61   | 37   | 53     | 73        | 88      | 118      | 86       |
| Umbertide                | 60                                   | 69       | 73    | 75    | 75  | 63   | 37   | 57     | 81        | 93      | 121      | 88       |
| Perugia                  | 56                                   | 66       | 68    | 75    | 76  | 63   | 41   | 56     | 79        | 91      | 117      | 84       |
| Todi                     | 56                                   | 67       | 68    | 71    | 76  | 55   | 30   | 44     | 70        | 89      | 111      | 82       |
| Marsciano                | 54                                   | 60       | 62    | 62    | 64  | 49   | 35   | 51     | 70        | 83      | 106      | 77       |
| Spoletto                 | 65                                   | 77       | 77    | 84    | 85  | 62   | 43   | 59     | 81        | 104     | 129      | 105      |
| Terni                    | 59                                   | 68       | 67    | 79    | 79  | 53   | 37   | 47     | 83        | 97      | 123      | 85       |
| Orvieto                  | 62                                   | 70       | 68    | 69    | 65  | 50   | 28   | 40     | 69        | 95      | 118      | 90       |

**Table S3.** Minimum and maximum monthly cumulated precipitation (mm) for each meteorological station for the period 1974-2021

| Station name | Città di Castello |       | Marsciano |       | Orvieto |       | Perugia |       | Spoletto |       | Terni |       | Todi |       | Umbertide |       |
|--------------|-------------------|-------|-----------|-------|---------|-------|---------|-------|----------|-------|-------|-------|------|-------|-----------|-------|
|              | min               | Max   | min       | Max   | min     | Max   | min     | Max   | min      | Max   | min   | Max   | min  | Max   | min       | Max   |
| January      | 5.2               | 157.8 | 1.6       | 167.7 | 1       | 194   | 3.6     | 190.2 | 1.2      | 186.8 | 4     | 167.2 | 1.2  | 186.8 | 1.4       | 215.8 |
| February     | 4.9               | 157   | 1.5       | 194.4 | 6.8     | 192.9 | 8.3     | 141.8 | 6.4      | 200.7 | 6.4   | 187   | 6.4  | 200.7 | 9.6       | 173.2 |
| March        | 2.2               | 157.1 | 1.8       | 162.2 | 1       | 214   | 1.5     | 177   | 1.3      | 215.4 | 0     | 164.6 | 1.3  | 215.4 | 0         | 209.4 |
| April        | 10                | 147   | 1.5       | 134   | 10      | 130.2 | 2       | 134.6 | 11.8     | 165.4 | 13.2  | 189   | 11.8 | 165.4 | 4         | 134.9 |
| May          | 5.6               | 150.2 | 0.5       | 158.4 | 4.8     | 181.2 | 16.2    | 224.6 | 1.4      | 172.6 | 3.4   | 163.8 | 1.4  | 172.6 | 1         | 160.1 |
| June         | 1.2               | 146.9 | 0         | 158.1 | 0.2     | 164.8 | 1.8     | 146.4 | 2.2      | 188.6 | 0.8   | 161.2 | 2.2  | 188.6 | 0.4       | 203.4 |
| July         | 1.4               | 158.2 | 0         | 186.3 | 0       | 123.4 | 2.2     | 149   | 0.2      | 165.2 | 0     | 175.8 | 0.2  | 165.2 | 0         | 187.8 |
| August       | 2.9               | 132   | 0.2       | 246.6 | 0       | 206.3 | 0       | 203.9 | 2        | 202.6 | 0     | 195.4 | 2    | 202.6 | 0         | 178.8 |
| September    | 3                 | 212.5 | 0         | 241.2 | 4.8     | 174.8 | 0       | 192.8 | 13       | 206.1 | 8.2   | 247   | 13   | 206.1 | 3.6       | 213.7 |
| October      | 3.2               | 208.2 | 8.6       | 165.4 | 3.8     | 231.6 | 5.4     | 236   | 7.2      | 228.8 | 5.2   | 230   | 7.2  | 228.8 | 9.1       | 217.4 |

|              |      |       |     |       |     |       |     |       |     |       |     |       |     |       |     |       |
|--------------|------|-------|-----|-------|-----|-------|-----|-------|-----|-------|-----|-------|-----|-------|-----|-------|
| r            |      |       |     |       |     |       |     |       |     |       |     |       |     |       |     |       |
| Novem<br>ber | 15.3 | 267   | 0   | 334.8 | 2.2 | 340.6 | 3   | 321.6 | 6.6 | 319.6 | 9   | 318.4 | 6.6 | 319.6 | 8.1 | 275.6 |
| Decem<br>ber | 3.4  | 189.2 | 1.5 | 221.2 | 2.5 | 308.8 | 2.2 | 223.6 | 1.4 | 254.6 | 1.2 | 214.6 | 1.4 | 254.6 | 3.2 | 192.2 |

**Table S4.** Annual maximum temperatures (T. max), monthly maximum temperatures (47 years averages) and standard errors per meteorological station and month

|                   |                  | Monthly maximum temperatures °C |          |          |          |          |          |          |            |               |          |          |          |
|-------------------|------------------|---------------------------------|----------|----------|----------|----------|----------|----------|------------|---------------|----------|----------|----------|
| Station name      | Annual<br>T. max | January                         | February | March    | April    | May      | June     | July     | Aug<br>ust | Septem<br>ber | October  | November | December |
| Città di Castello | 19.4             | 8.8 ±0.6                        | 10.4±0.8 | 14.3±0.8 | 17.9±0.8 | 22.9±0.8 | 27.5±0.8 | 31.1±0.7 | 31.0±0.7   | 25.7±0.7      | 19.9±0.7 | 13.5±0.7 | 9.5±0.6  |
| Umbertide         | 20.5 ±0.5        | 9.7±0.6                         | 11.5±0.8 | 15.5±0.8 | 18.9±0.8 | 23.9±0.8 | 28.6±0.8 | 32.2±0.7 | 32.1±0.7   | 26.8±0.7      | 20.9±0.7 | 14.5±0.7 | 10.4±0.6 |
| Perugia           | 19.1±0.5         | 8.7±0.6                         | 10.3±0.7 | 13.9±0.8 | 17.4±0.8 | 22.4±0.8 | 27.1±0.8 | 30.8±0.7 | 30.6±0.7   | 25.3±0.7      | 19.6±0.7 | 13.3±0.7 | 9.6±0.6  |
| Todi              | 19.6±0.5         | 8.9±0.6                         | 11.0±0.7 | 14.5±0.7 | 18.0±0.8 | 22.9±0.8 | 27.6±0.8 | 31.4±0.6 | 31.1±0.7   | 25.8±0.7      | 20.1±0.7 | 13.5±0.7 | 9.4±0.6  |
| Marsciano         | 20.1±0.5         | 9.3±0.6                         | 11.4±0.7 | 15.0±0.8 | 18.5±0.8 | 23.4±0.7 | 28.2±0.8 | 32.1±0.6 | 31.9±0.7   | 26.6±0.7      | 20.7±0.7 | 14.0±0.7 | 9.8±0.6  |
| Spoleto           | 20.1±0.5         | 9.4±0.6                         | 11.4±0.7 | 15.0±0.7 | 18.5±0.8 | 23.4±0.8 | 28.1±0.8 | 31.8±0.6 | 31.7±0.7   | 26.4±0.7      | 20.6±0.7 | 14.0±0.7 | 9.9±0.6  |
| Terni             | 21.0±0.4         | 11.2±0.5                        | 13.1±0.6 | 16.3±0.7 | 19.4±0.7 | 24.0±0.7 | 28.4±0.7 | 31.6±0.6 | 31.6±0.6   | 26.9±0.6      | 21.7±0.6 | 15.7±0.6 | 11.8±0.4 |
| Orvieto           | 20.5±0.5         | 9.9±0.6                         | 11.6±0.8 | 15.1±0.8 | 18.6±0.8 | 23.6±0.8 | 28.5±0.8 | 32.3±0.7 | 32.3±0.7   | 26.9±0.7      | 21.1±0.7 | 14.7±0.7 | 10.7±0.6 |

**Table S5.** Annual minimum temperatures (T. min), monthly minimum temperatures (47 years averages) and standard errors per meteorological station and month

| Station name      | Annual<br>T. min | Monthly minimum temperatures °C |          |         |         |          |          |          |          |           |          |          |          |
|-------------------|------------------|---------------------------------|----------|---------|---------|----------|----------|----------|----------|-----------|----------|----------|----------|
|                   |                  | January                         | February | March   | April   | May      | June     | July     | August   | September | October  | November | December |
| Città di Castello | 7.3±0.3          | 0.0±0.7                         | 0.3±0.7  | 2.5±0.7 | 5.3±0.6 | 9.4±0.5  | 12.9±0.5 | 15.2±0.4 | 15.2±0.4 | 11.9±0.5  | 8.6±0.6  | 4.5±0.7  | 1.3±0.7  |
| Umbertide         | 7.8±0.3          | 0.6±0.7                         | 1.0±0.8  | 3.4±0.7 | 6.0±0.6 | 9.9±0.5  | 13.4±0.5 | 15.6±0.5 | 15.6±0.5 | 12.4±0.6  | 9.1±0.6  | 5.0±0.8  | 1.8±0.8  |
| Perugia           | 10.2±0.3         | 2.6±0.6                         | 3.1±0.6  | 5.3±0.6 | 8.0±0.5 | 12.1±0.5 | 15.9±0.5 | 18.6±0.4 | 18.7±0.5 | 15.2±0.5  | 11.4±0.5 | 7.0±0.6  | 3.6±0.6  |
| Todi              | 9.0±0.3          | 1.4±0.7                         | 2.0±0.7  | 4.3±0.6 | 7.0±0.5 | 11.1±0.5 | 14.8±0.5 | 17.4±0.4 | 17.5±0.5 | 14.0±0.5  | 10.2±0.6 | 5.8±0.7  | 2.5±0.7  |
| Marsciano         | 7.5±0.3          | 0.0±0.7                         | 0.5±0.7  | 2.7±0.6 | 5.4±0.5 | 9.4±0.5  | 13.0±0.5 | 15.5±0.4 | 15.7±0.4 | 12.5±0.5  | 8.8±0.6  | 4.5±0.7  | 1.2±0.7  |
| Spoletto          | 8.9±0.3          | 1.4±0.7                         | 2.1±0.7  | 4.3±0.6 | 7.0±0.5 | 11.0±0.5 | 14.6±0.5 | 17.1±0.5 | 17.2±0.5 | 13.8±0.5  | 10.1±0.6 | 5.7±0.7  | 2.5±0.7  |
| Terni             | 10.7±0.3         | 3.0±0.7                         | 3.7±0.7  | 6.1±0.6 | 8.6±0.5 | 12.7±0.5 | 16.5±0.5 | 19.0±0.4 | 19.1±0.4 | 15.7±0.5  | 11.8±0.6 | 7.4±0.7  | 4.1±0.7  |
| Orvieto           | 9.7±0.3          | 2.2±0.6                         | 2.7±0.7  | 4.8±0.6 | 7.5±0.5 | 11.5±0.5 | 15.2±0.5 | 17.9±0.4 | 18.0±0.4 | 14.7±0.5  | 11.0±0.6 | 6.6±0.7  | 3.4±0.6  |

**Table S6.** Annual mean temperatures (T. mean), monthly mean temperatures (47 years averages) and standard errors per meteorological station and month

| Station name      | Annual<br>T. mean | Monthly mean temperatures °C |          |          |          |          |          |          |          |           |          |          |          |
|-------------------|-------------------|------------------------------|----------|----------|----------|----------|----------|----------|----------|-----------|----------|----------|----------|
|                   |                   | January                      | February | March    | April    | May      | June     | July     | August   | September | October  | November | December |
| Città di Castello | 13.4 ±0.1         | 4.4±0.1                      | 5.4±0.1  | 8.4±0.1  | 11.6±0.1 | 16.1±0.1 | 20.2±0.1 | 23.2±0.1 | 23.1±0.1 | 18.8±0.1  | 14.2±0.1 | 9.0±0.1  | 5.4±0.1  |
| Umbertide         | 14.2±0.1          | 5.2±0.1                      | 6.2±0.1  | 9.4±0.1  | 12.4±0.1 | 16.9±0.1 | 21.0±0.1 | 23.9±0.1 | 23.8±0.1 | 19.6±0.1  | 15.0±0.1 | 9.8±0.1  | 6.1±0.1  |
| Perugia           | 14.7±0.1          | 5.6±0.1                      | 6.7±0.1  | 9.6±0.1  | 12.7±0.1 | 17.3±0.1 | 21.5±0.1 | 24.7±0.1 | 24.7±0.1 | 20.2±0.1  | 15.5±0.1 | 10.2±0.1 | 6.6±0.1  |
| Todi              | 14.3±0.1          | 5.1±0.1                      | 6.5±0.1  | 9.4±0.1  | 12.5±0.1 | 17.0±0.1 | 21.2±0.1 | 24.4±0.1 | 24.3±0.1 | 19.9±0.1  | 15.2±0.1 | 9.7±0.1  | 5.9±0.1  |
| Marsciano         | 13.8±0.1          | 4.7±0.1                      | 6.0±0.1  | 8.9±0.1  | 11.9±0.1 | 16.4±0.1 | 20.6±0.1 | 23.8±0.1 | 23.8±0.1 | 19.5±0.1  | 14.7±0.1 | 9.2±0.1  | 5.5±0.1  |
| Spoletto          | 14.5±0.1          | 5.4±0.1                      | 6.7±0.1  | 9.6±0.1  | 12.7±0.1 | 17.2±0.1 | 21.3±0.1 | 24.5±0.1 | 24.4±0.1 | 20.1±0.1  | 15.4±0.1 | 9.9±0.1  | 6.2±0.1  |
| Terni             | 15.9±0.1          | 7.1±0.1                      | 8.4±0.1  | 11.2±0.1 | 14.0±0.1 | 18.4±0.1 | 22.4±0.1 | 25.3±0.1 | 25.4±0.1 | 21.3±0.1  | 16.8±0.1 | 11.6±0.1 | 7.9±0.1  |
| Orvieto           | 15.1±0.1          | 6.0±0.1                      | 7.1±0.1  | 10.0±0.1 | 13.1±0.1 | 17.5±0.1 | 21.8±0.1 | 25.1±0.1 | 25.1±0.1 | 20.8±0.1  | 16.1±0.1 | 10.6±0.1 | 7.0±0.1  |

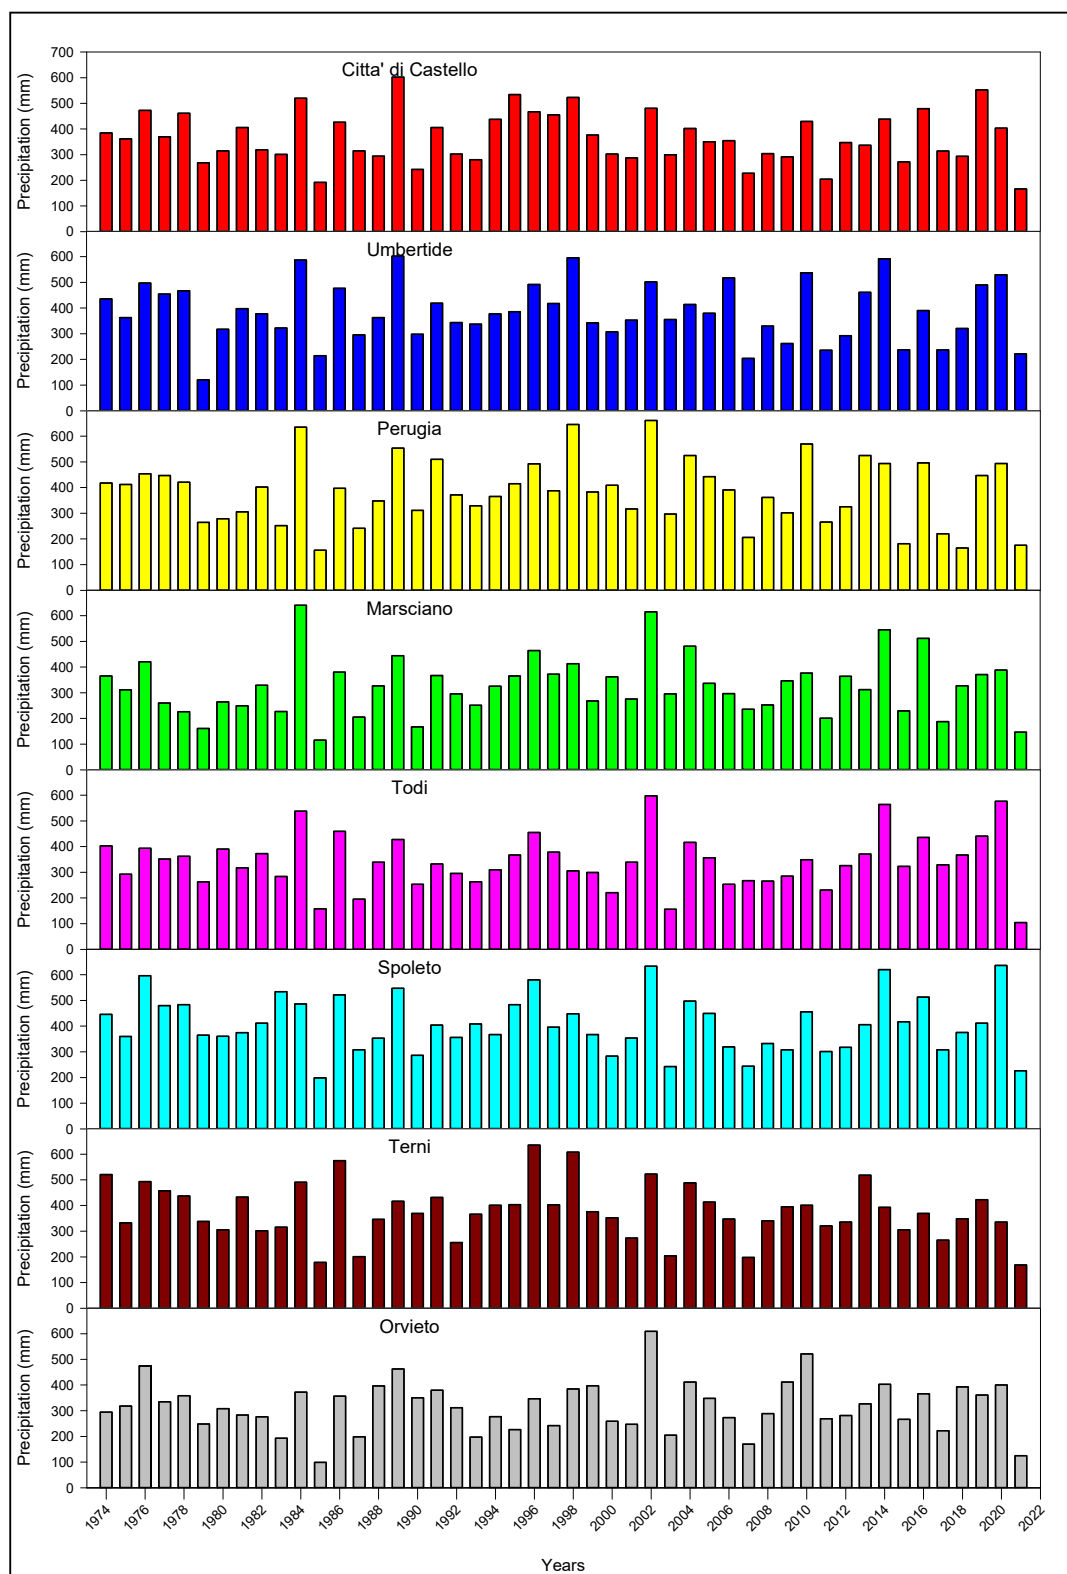

**Figure S1.** Precipitations from April to September recorded from 1974 to 2021 in each meteorological station represented by different colors and per year

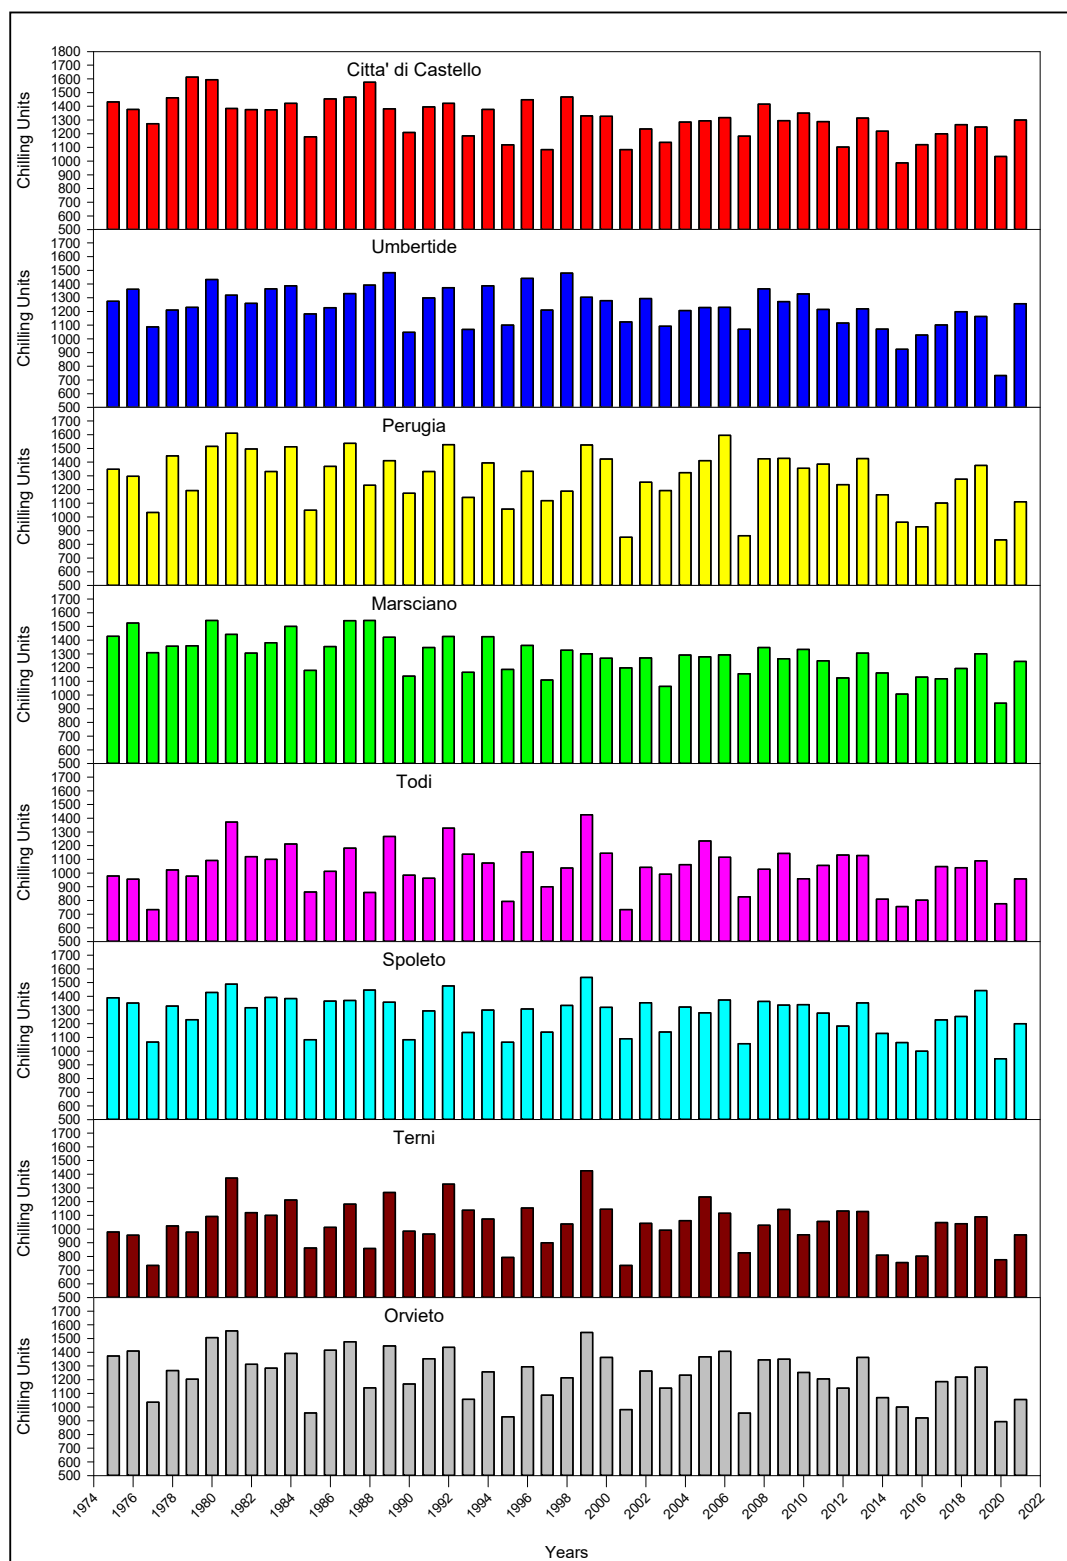

**Figure S2.** Chilling units recorded from 1974 to 2021 in each meteorological station represented by different colors and per year



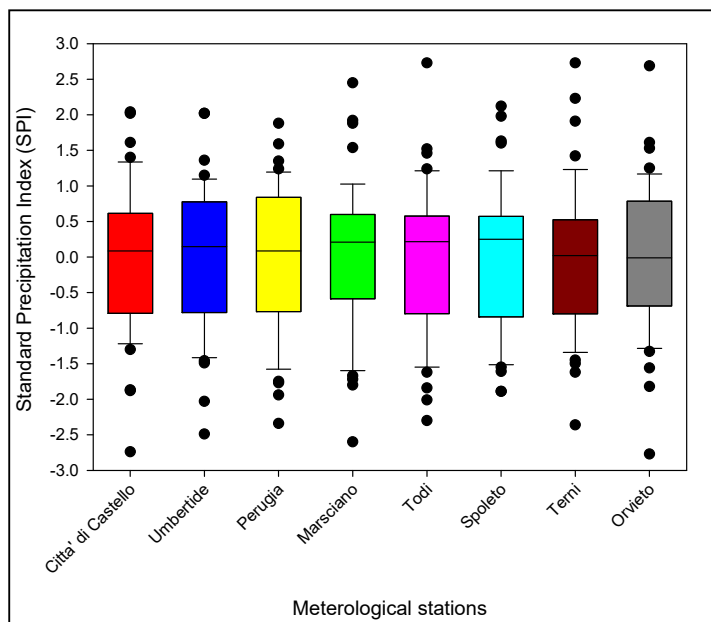

**Figure S3.** Box plots of Standard Precipitation Index (SPI) from 1974 to 2021 at 4-month time scales (June-August) from the different meteorological stations represented by different colors. Whiskers (error bars) above and below the box indicate the 90<sup>th</sup> and 10<sup>th</sup> percentiles. The horizontal line shows the median value. Black dots display extreme data points.

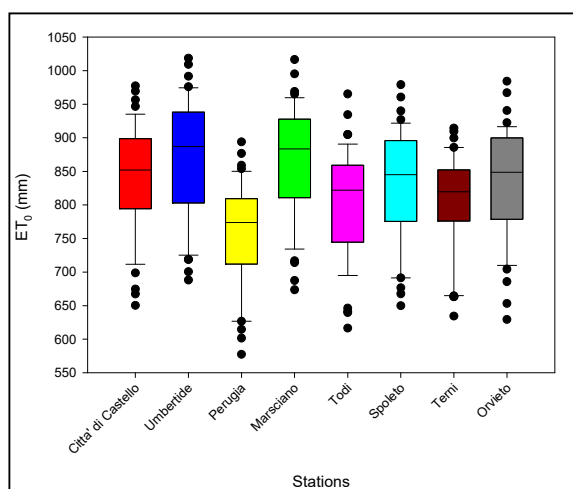

**Figure S4.** Box plots of ET<sub>0</sub> from April to September, from 1974 to 2021, per each meteorological station represented by different colors. Whiskers (error bars) above and below the box indicate the 90<sup>th</sup> and 10<sup>th</sup> percentiles. The horizontal line shows the median value. Black dots display extreme data points.

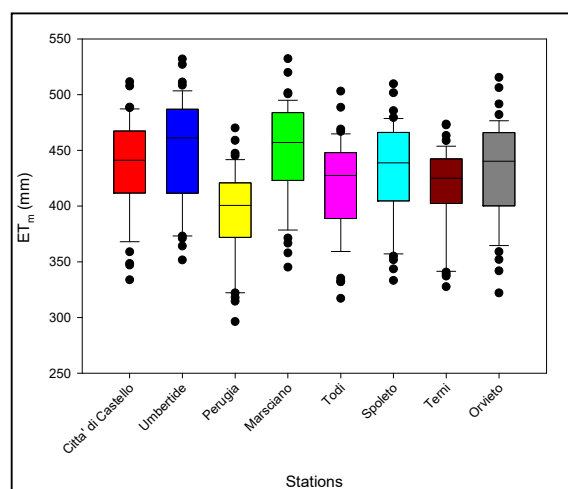

**Figure S5.** Box plots of ET<sub>m</sub> from April to September, from 1974 to 2021, per each meteorological station represented by different colors. Whiskers (error bars) above and below the box indicate the 90<sup>th</sup> and 10<sup>th</sup> percentiles. The horizontal line shows the median value. Black dots display extreme data points.

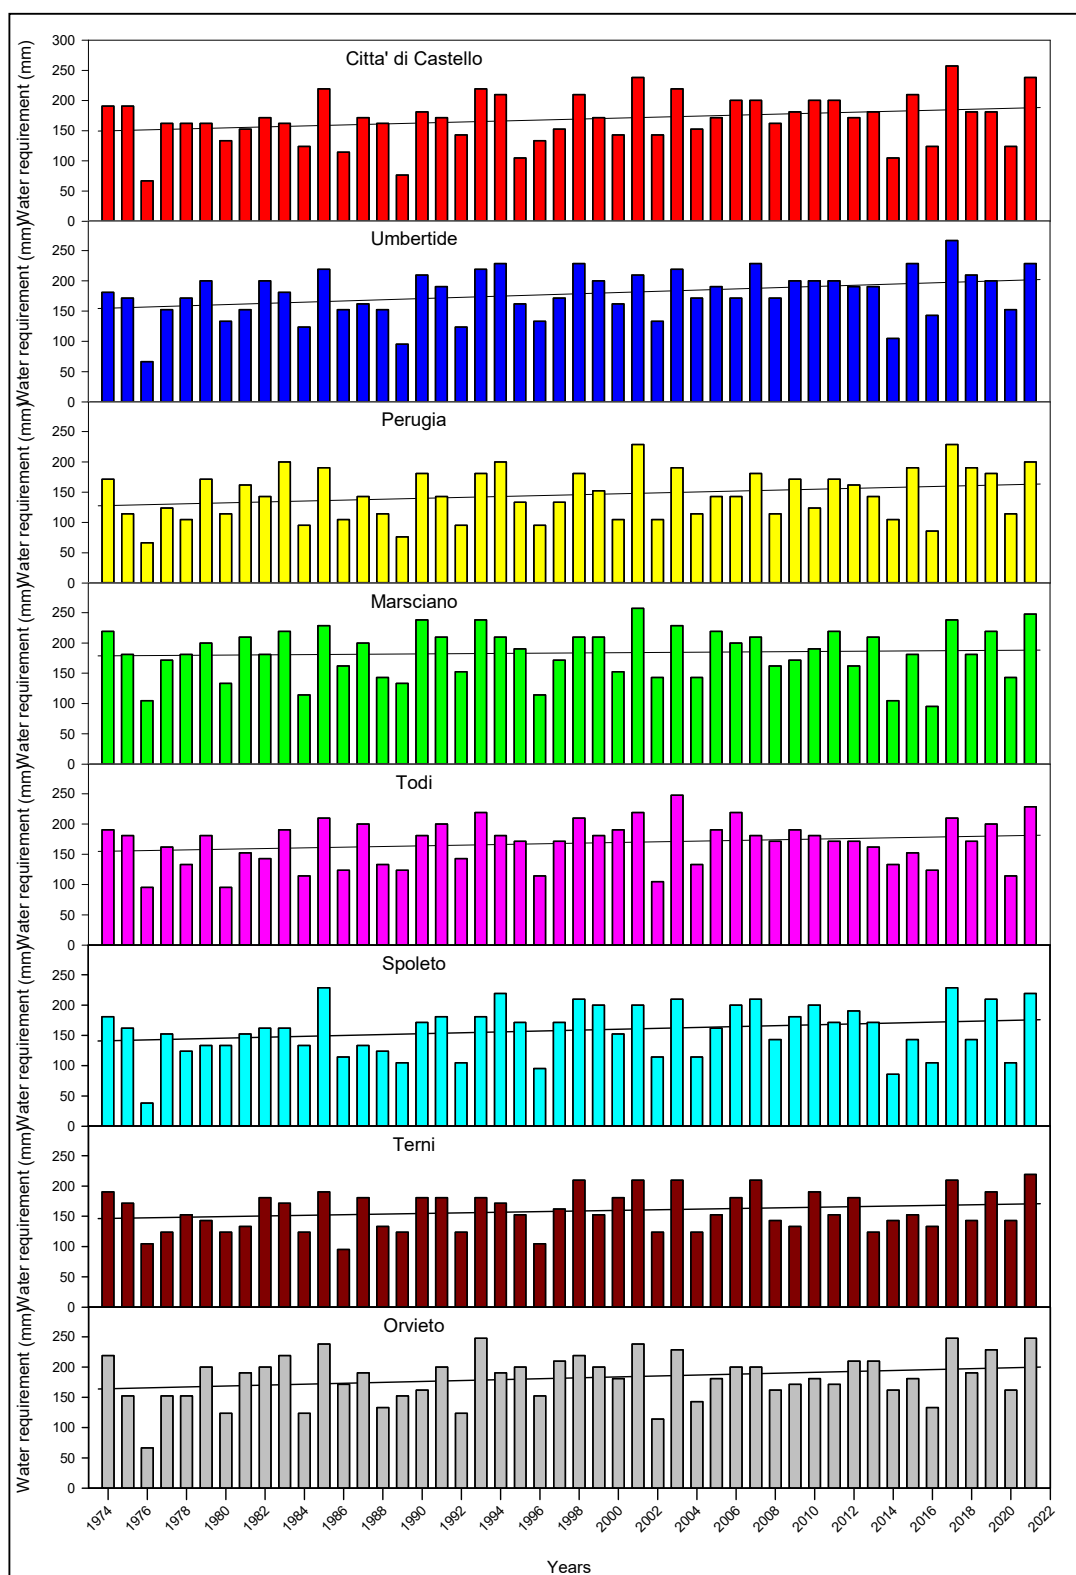

**Figure S6.** Water requirements from June to August per loam soil, recorded from 1974 to 2021 in each meteorological station represented by different colors. The black lines indicate the trend.

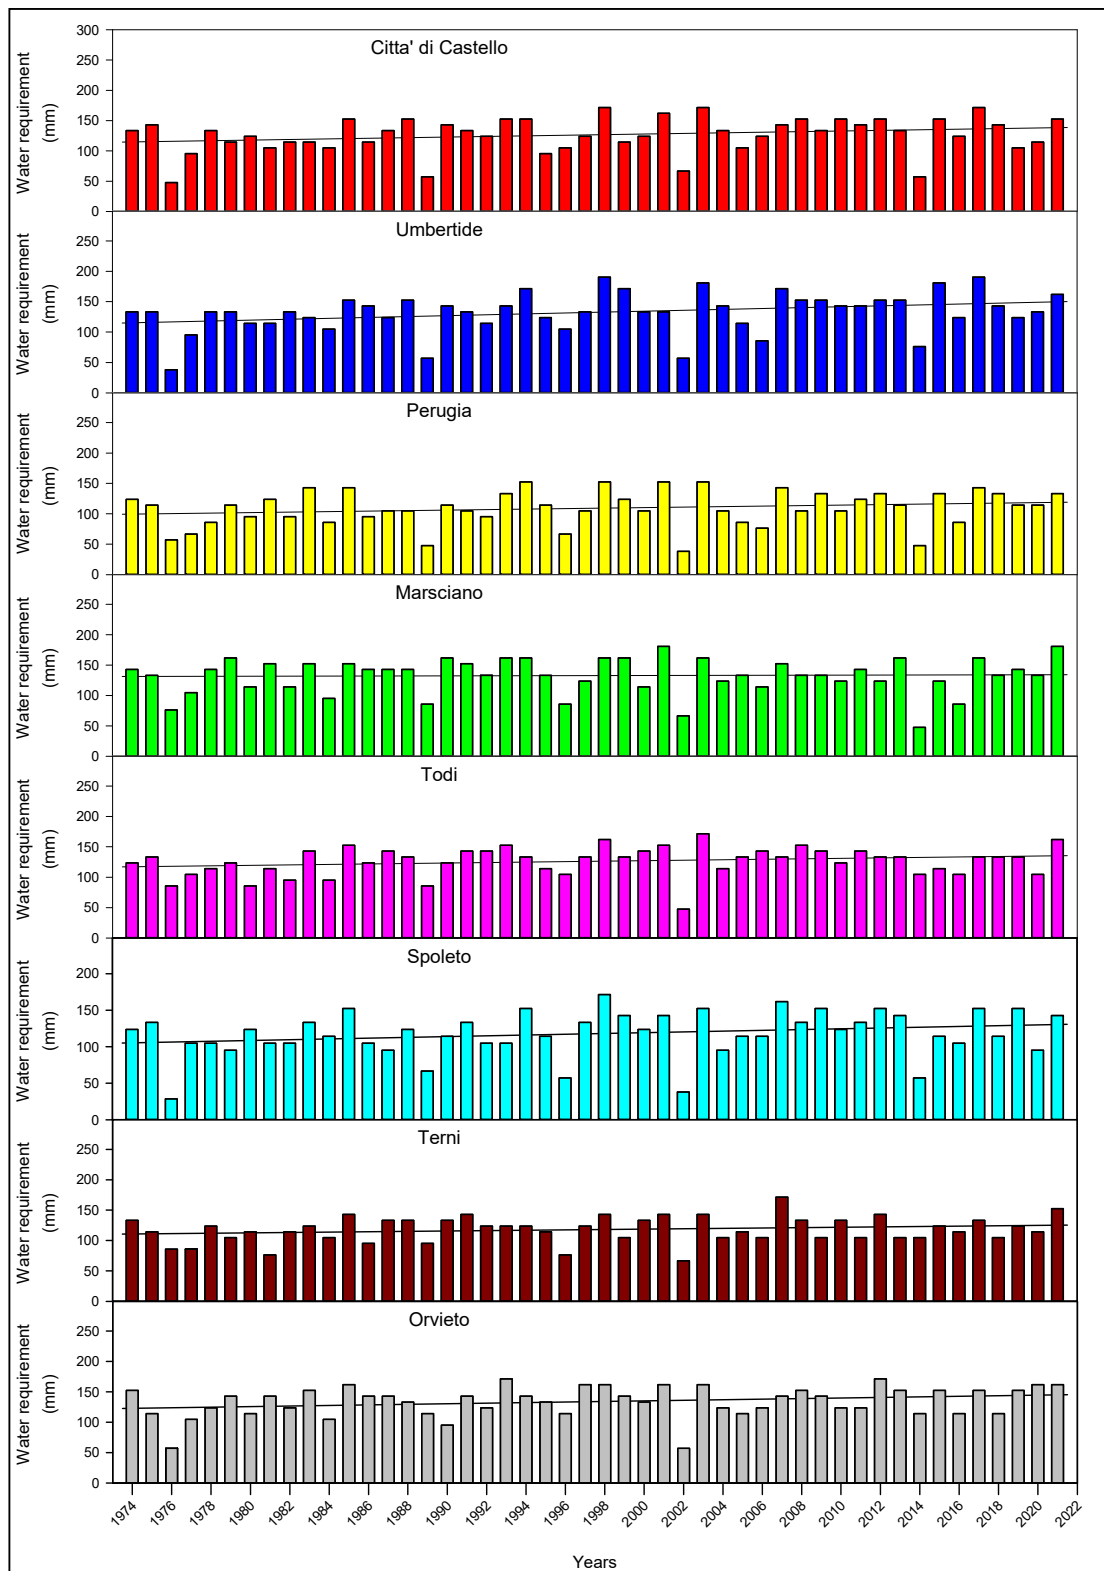

**Figure S7.** Water requirements from July to August per loam soil, recorded from 1974 to 2021 in each meteorological station represented by different colors. The black lines indicate the trend.

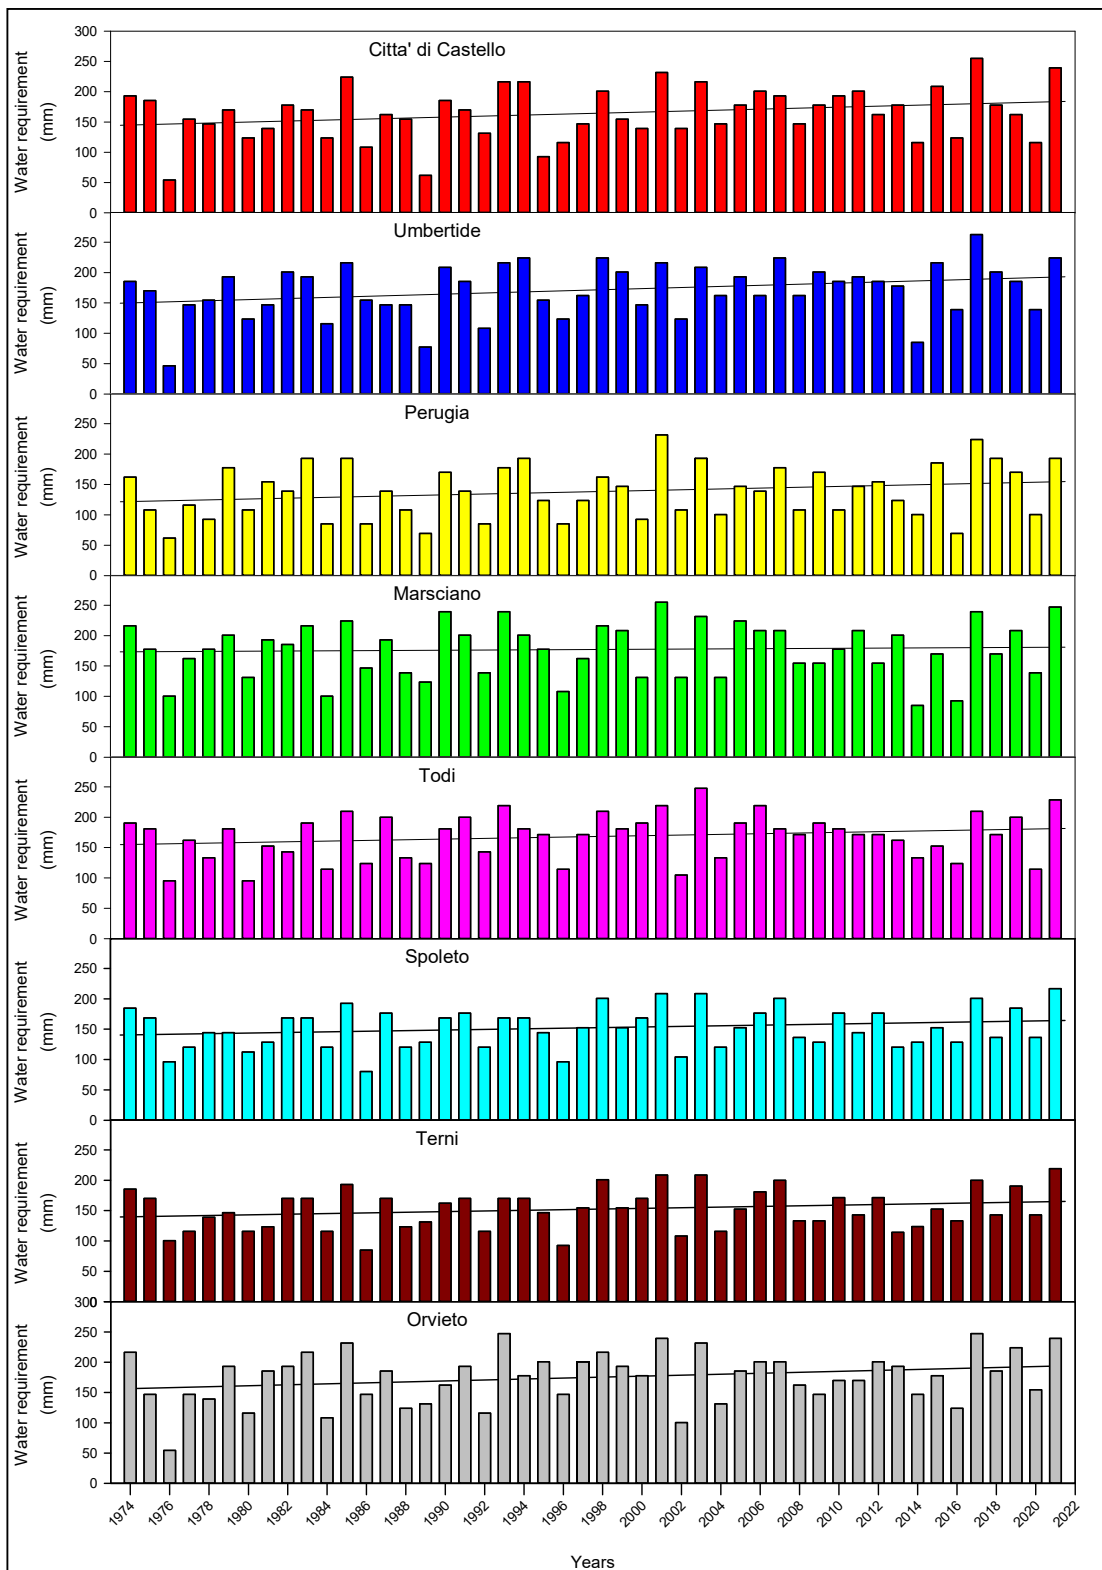

**Figure S8.** Water requirements from June to August per silty clay soil, recorded from 1974 to 2021 in each meteorological station represented by different colors. The black lines indicate the trend.

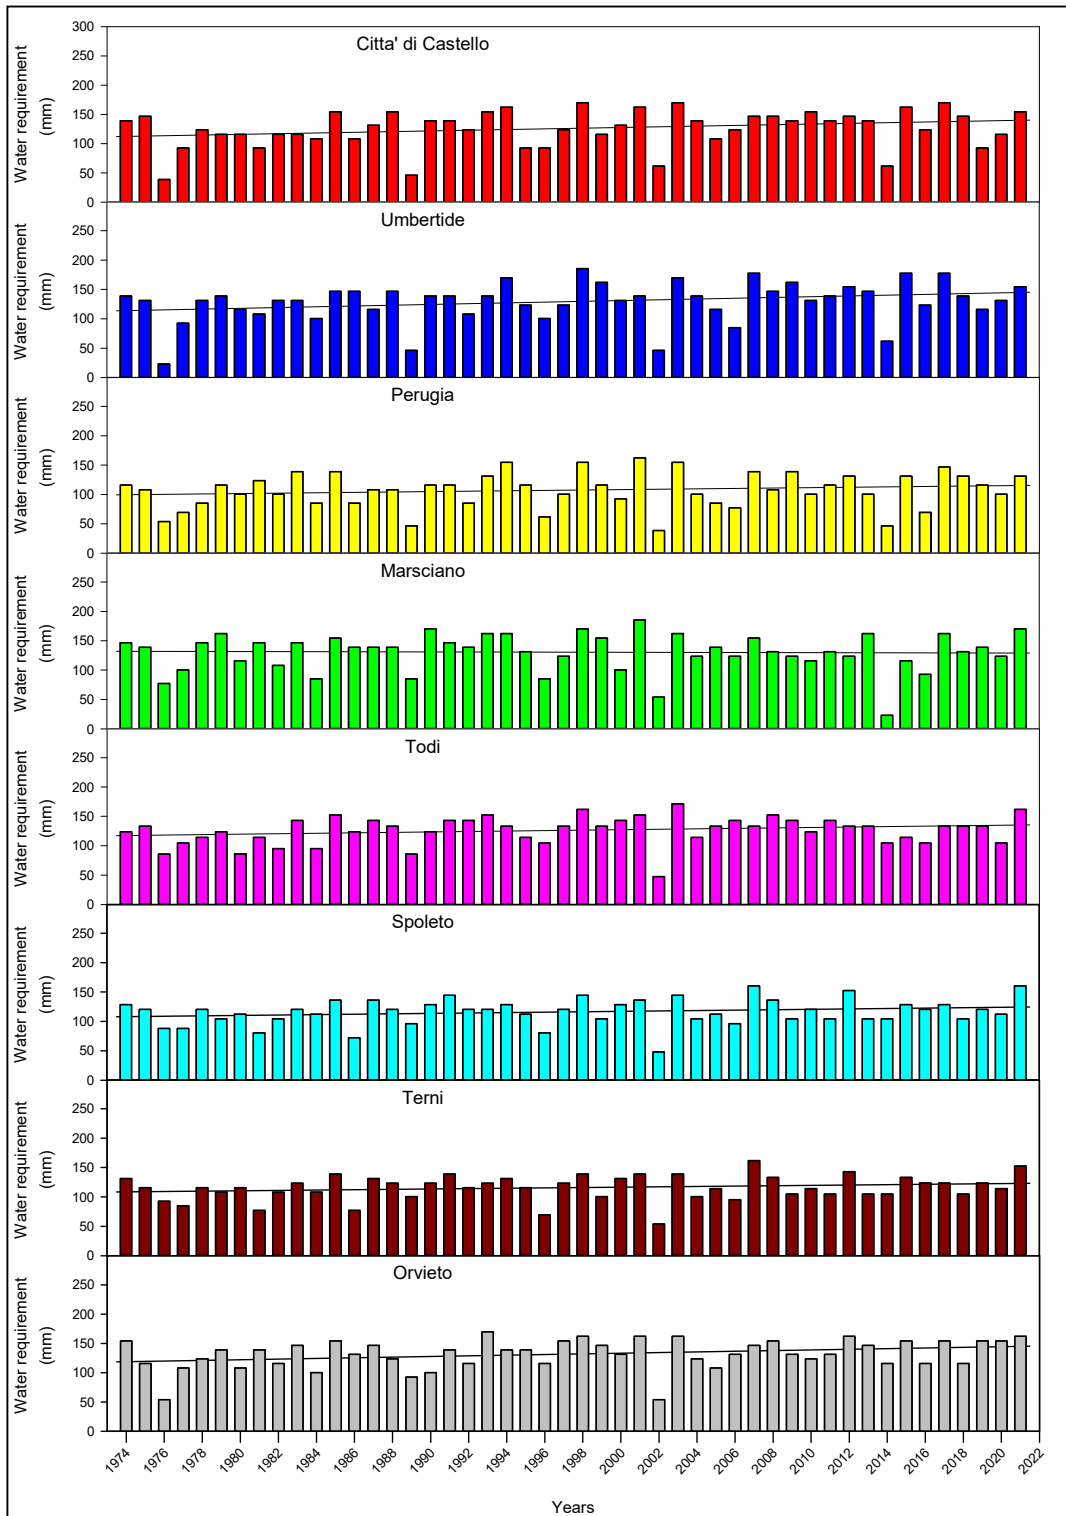

**Figure S9.** Water requirements from July to August per silty clay soil, recorded from 1974 to 2021 in each meteorological station represented by different colors. The black lines indicate the trend.
